# Supplementary material for: Synthetic 5′-phosphorylated oligodeoxynucleotide purification through catching full-length sequences by polymerization
Source: Royal Society of Chemistry journal article supplement (doi:10.1039/c2ra01357f), 2012-01-01

Supporting information for

**Synthetic 5'-phosphorylated oligodeoxynucleotide purification through catching full-length sequence by polymerization†**

Yinan Yuan,<sup>a,b</sup> Suntara Fueangfung,<sup>a</sup> Xi Lin,<sup>a</sup> Durga Pokharel,<sup>a</sup> Shiyue Fang<sup>\*a</sup>

<sup>a</sup>Department of Chemistry, Michigan Technological University, 1400 Townsend Drive, Houghton, Michigan 49931, USA.

<sup>b</sup>School of Forest Resources and Environmental Science, Michigan Technological University, 1400 Townsend Drive, Houghton, Michigan 49931, USA.

Fax: (906)487-2061; Tel: (906)487-2023

E-mail: shifang@mtu.edu

<sup>1</sup>H, <sup>13</sup>C NMR, and <sup>31</sup>P NMR spectra of new compounds; and MALDI-TOF mass spectrum of ODN **8**

<sup>1</sup>H NMR spectrum of **3** in CDCl<sub>3</sub> at 400 MHz

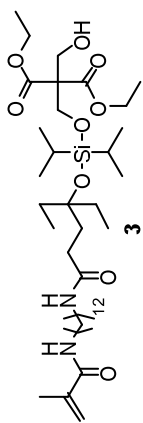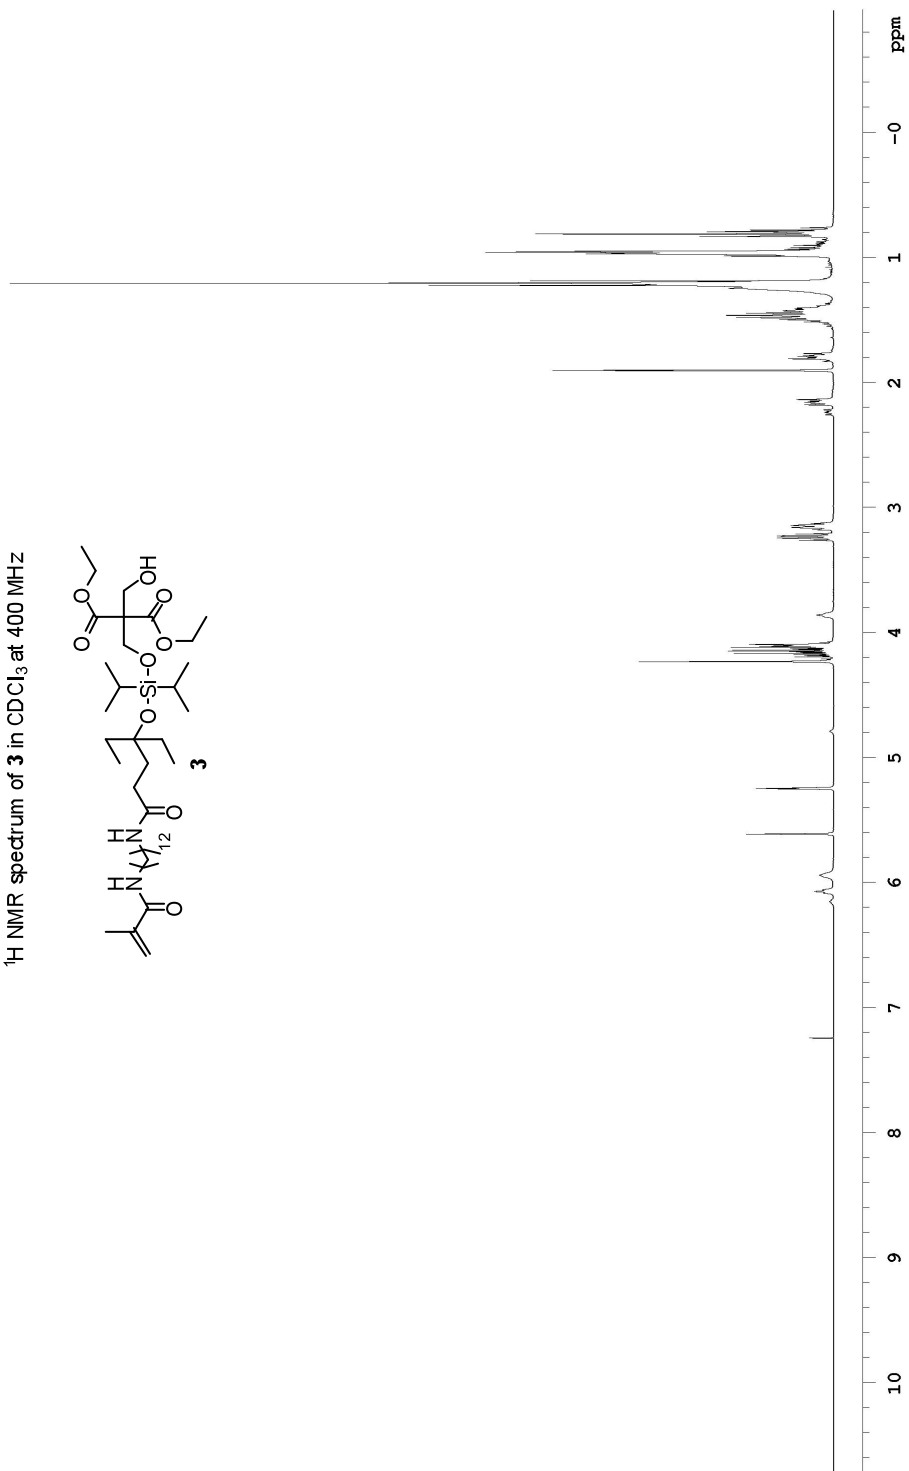

$^{13}\text{C}$  NMR spectrum of **3** in  $\text{CDCl}_3$  at 100 MHz

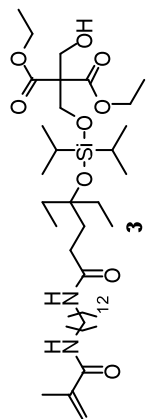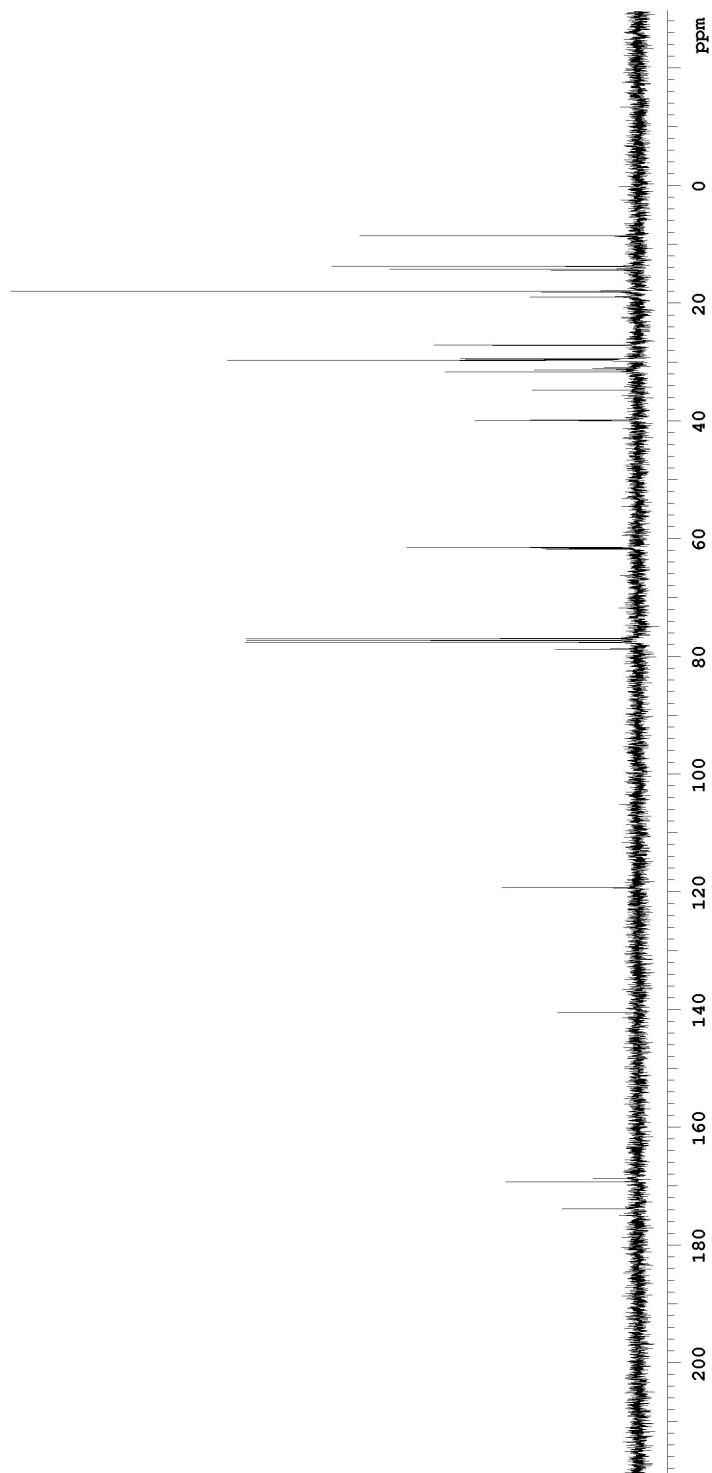

$^1\text{H}$  NMR spectrum of **1** in  $\text{CDCl}_3$  at 400 MHz

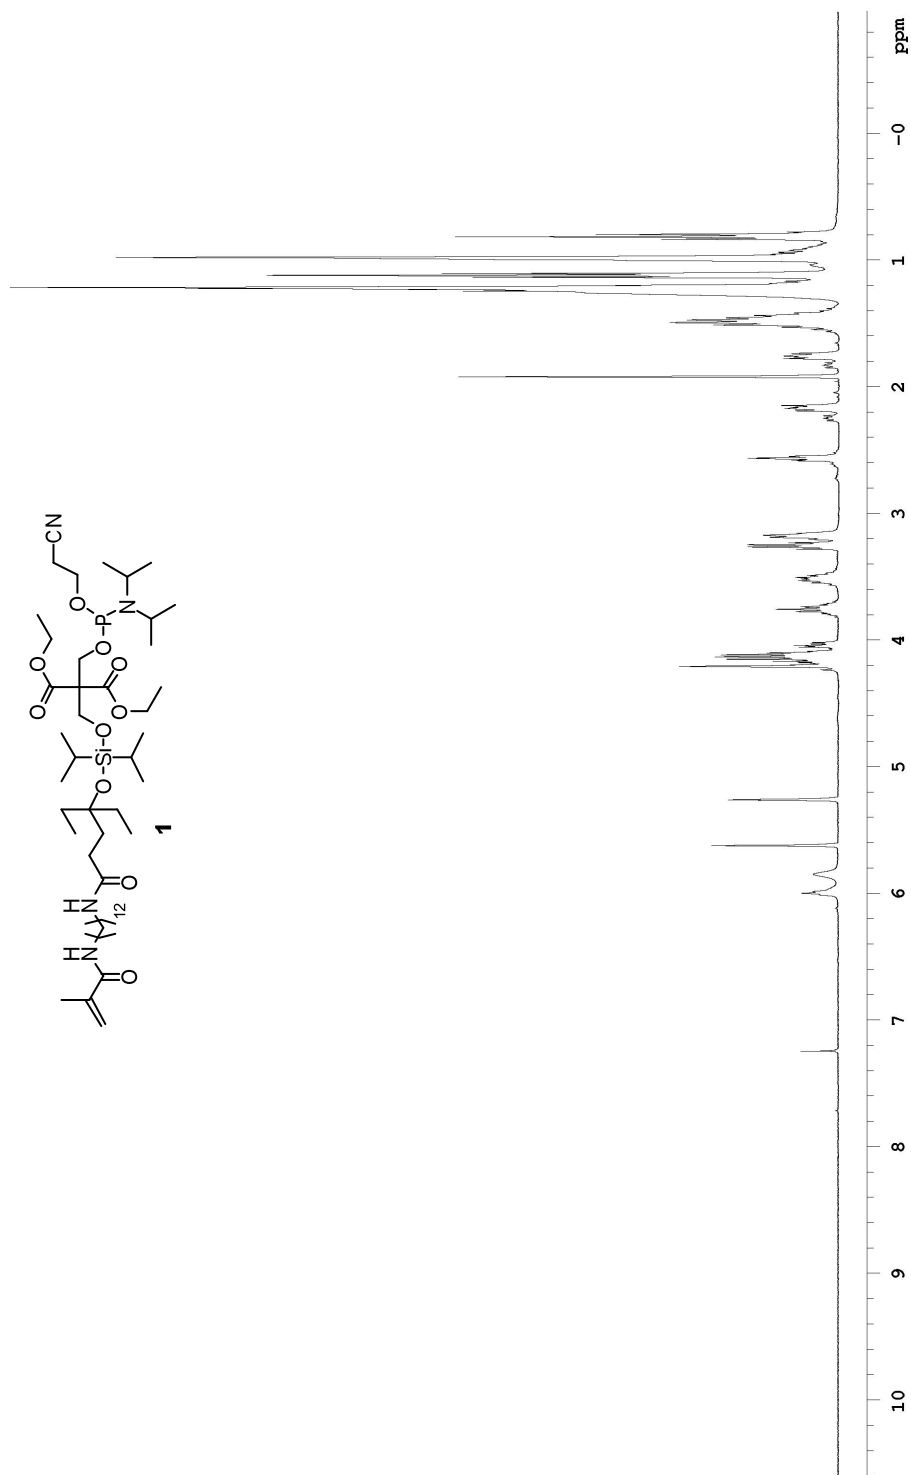

$^{13}\text{C}$  NMR spectrum of **1** in  $\text{CDCl}_3$  at 100 MHz

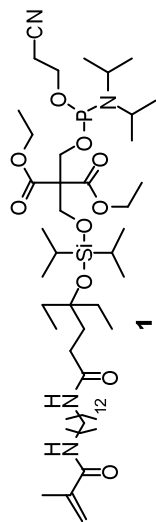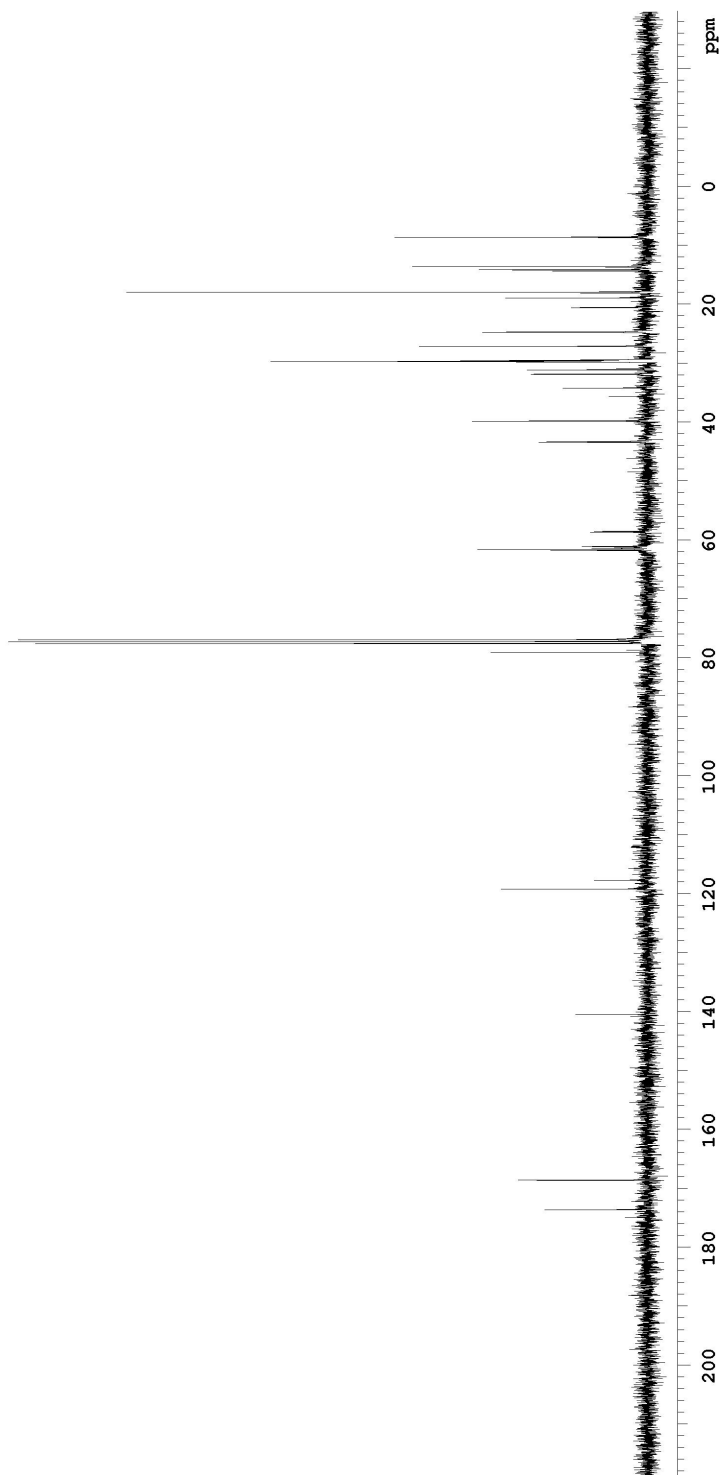

$^{31}\text{P}$  NMR spectrum of **1** in  $\text{CDCl}_3$  at 162 MHz

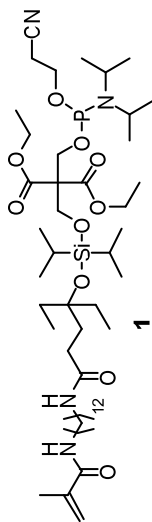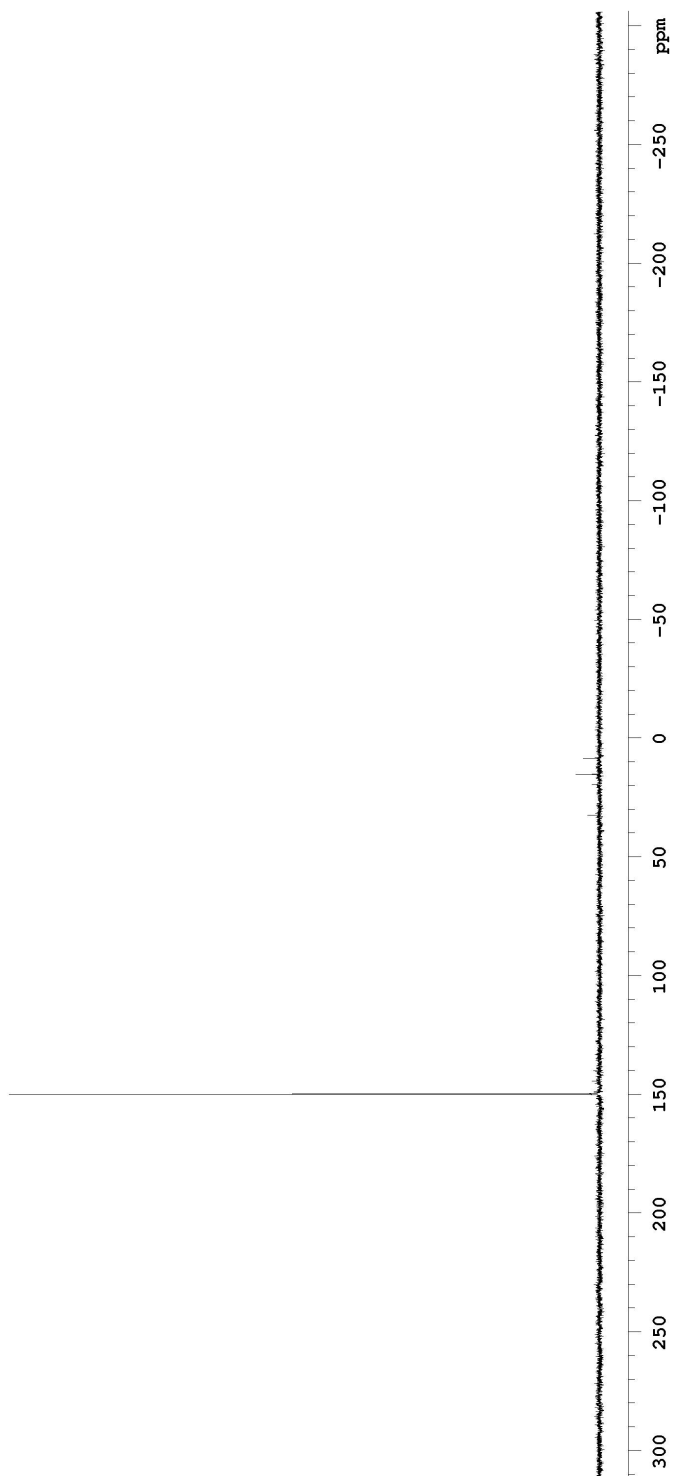

5047 = # 2

Data: 03042011\_10498\_0001.C8[c] 4 Mar 2011 10:58 Cal: LN\_BSA\_cytC 3 May 2007 15:40

Shimadzu Biotech Axima CFRplus 2.8.1.20080410: Mode linear\_neg, Power: 180, Blanked, P.Ext. @ 6000 (bin 148)

%Int. 0.4 mV[sum= 266 mV] Profiles 1-740 Smooth Av 25

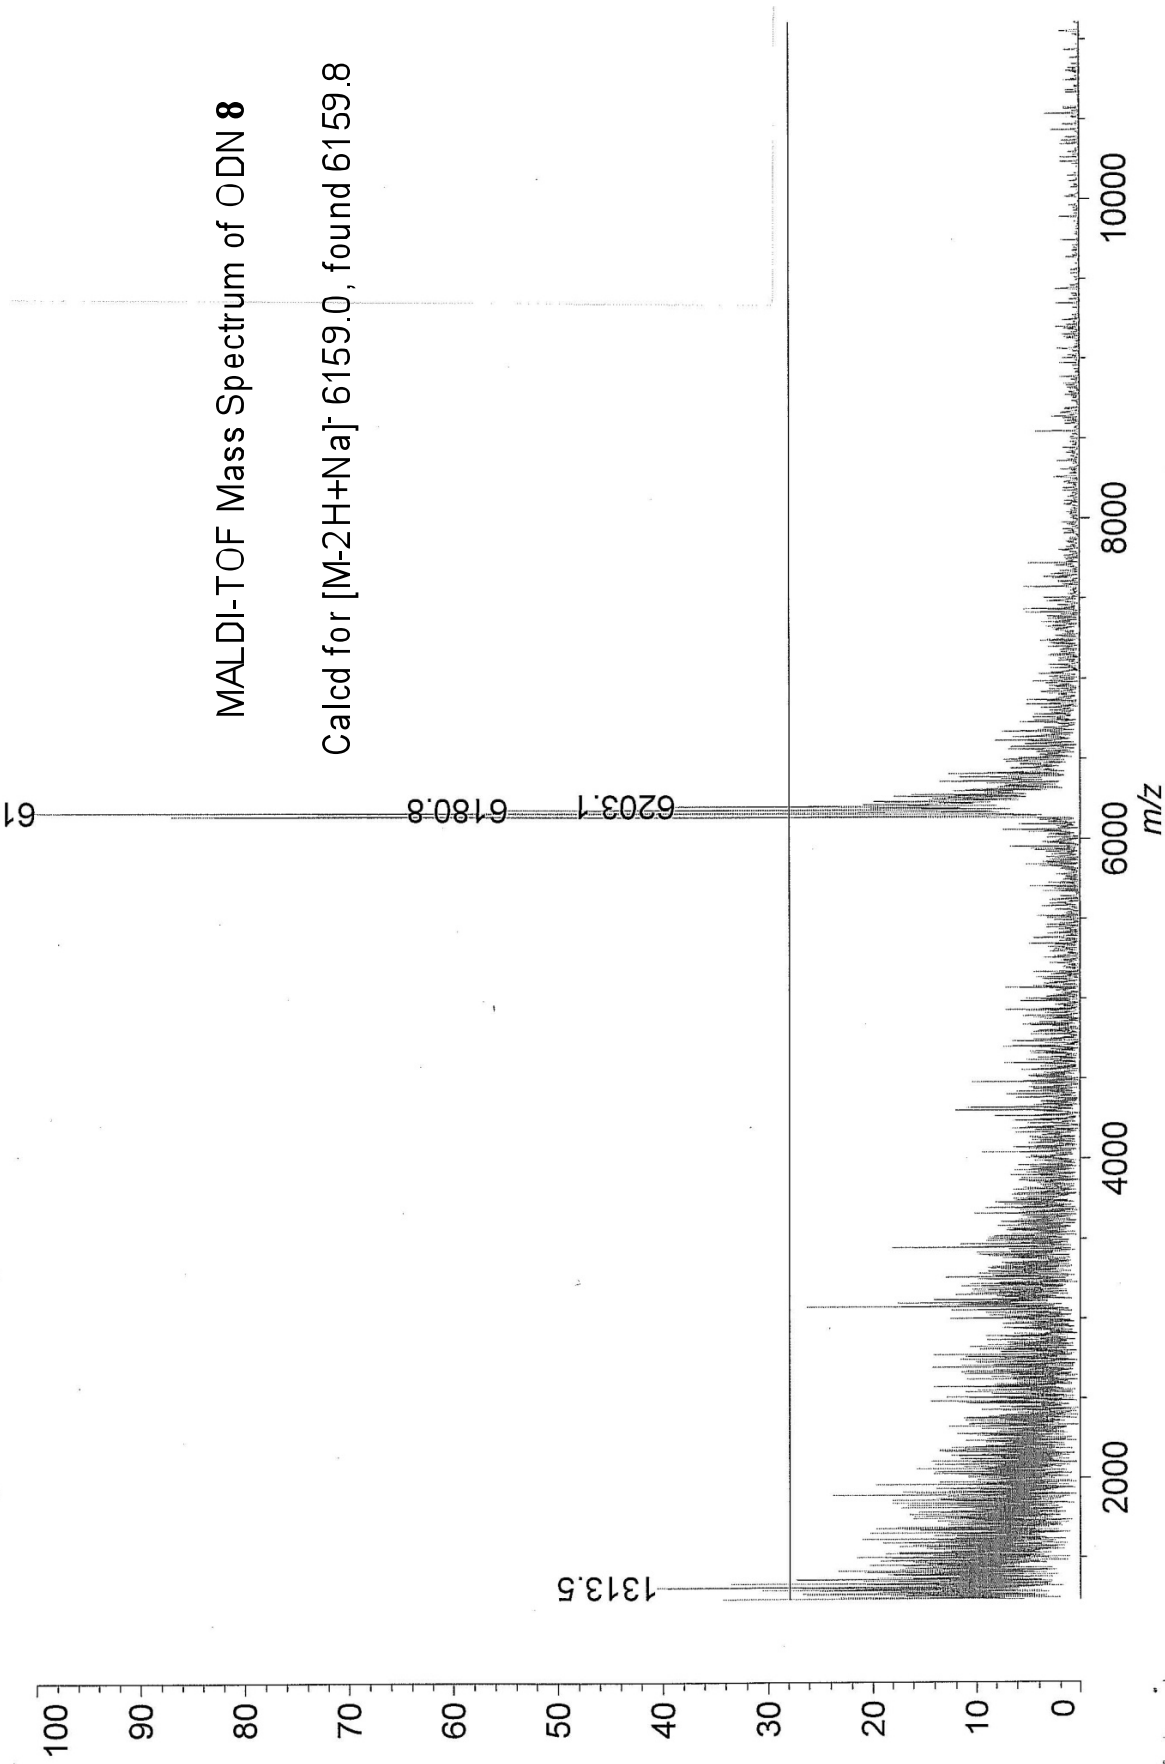

5047

Data: 03042011\_10498\_0001.C8[c] 4 Mar 2011 10:58 Cal: LN\_BSA\_cytC 3 May 2007 15:40  
Shimadzu Biotech Axima CFRplus 2.8.1.20080410: Mode linear\_neg, Power: 180, Blanked, P.Ext. @ 6000 (bin 148)

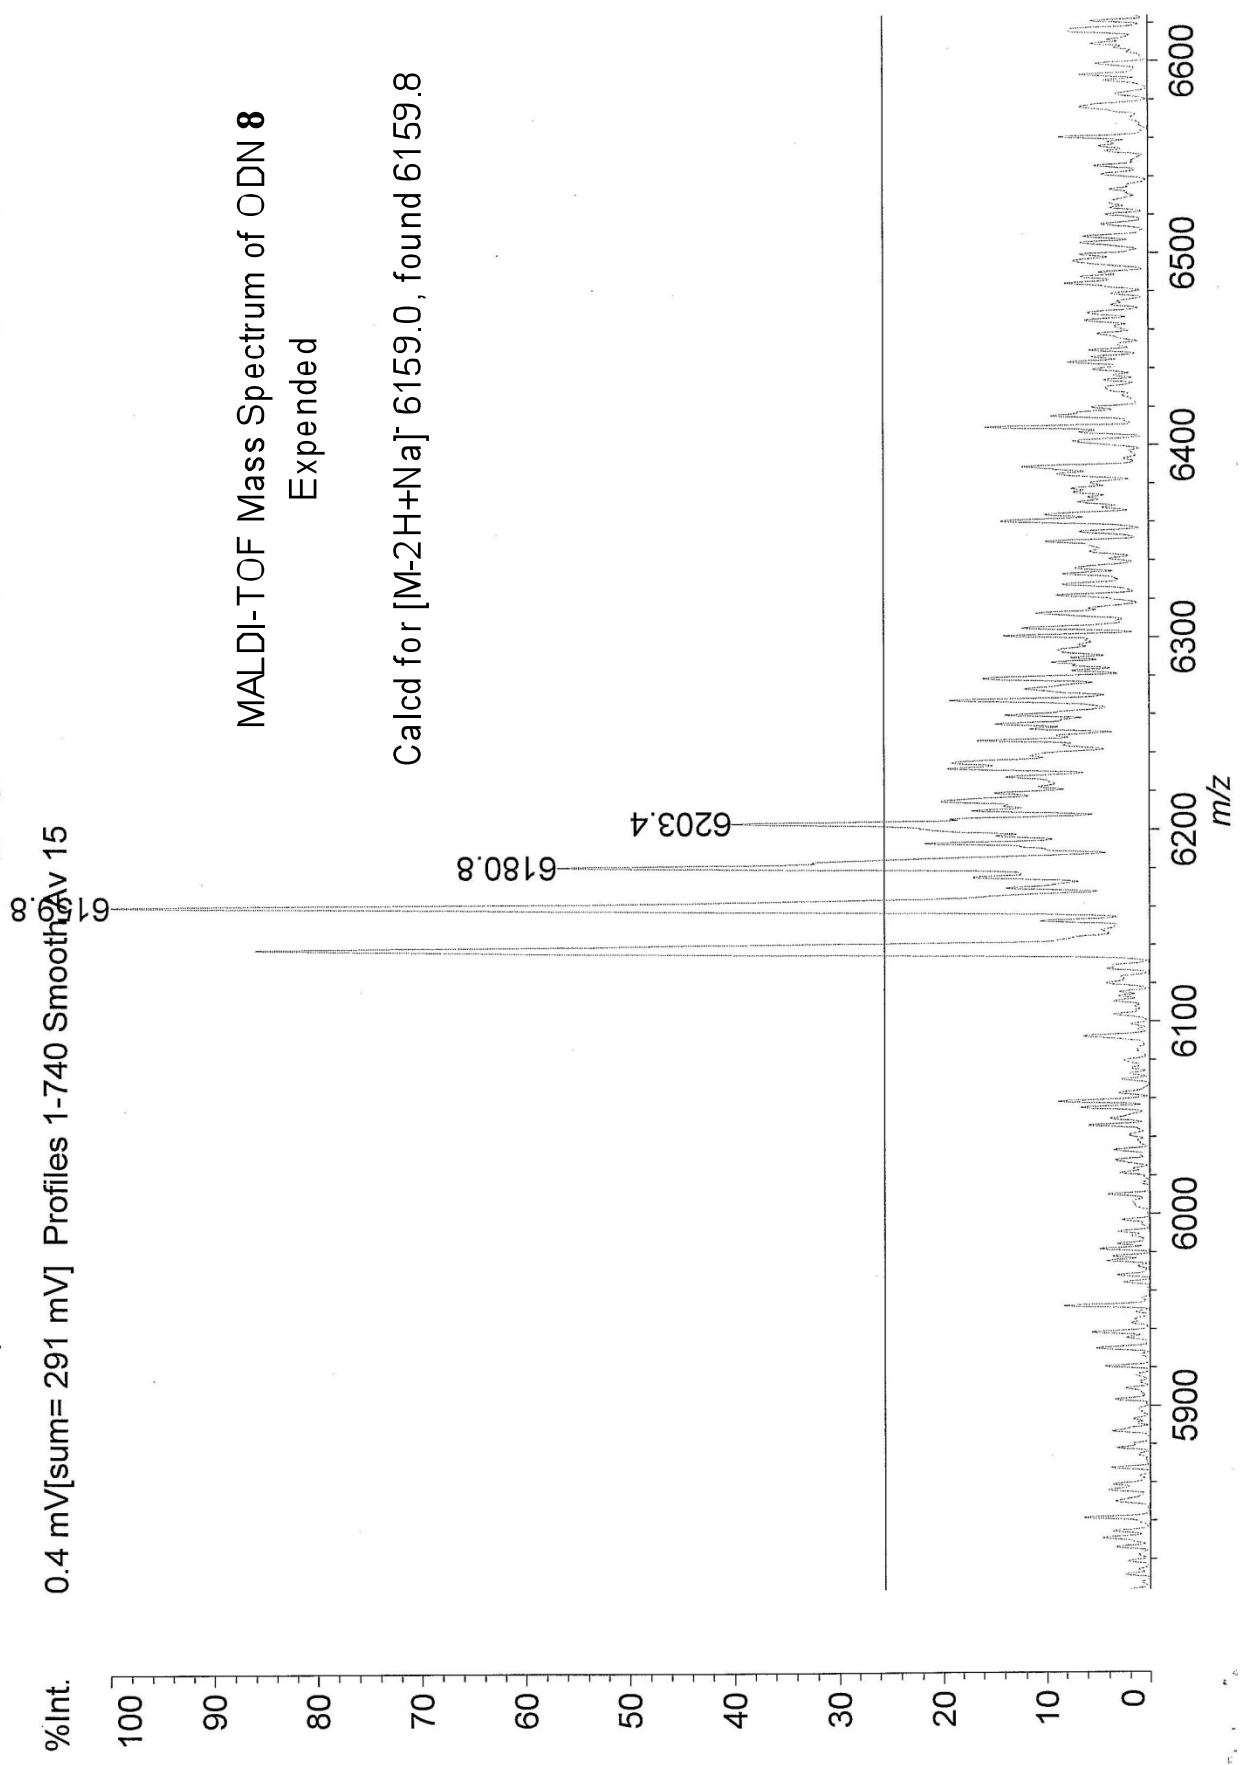



Data: 03042011\_10498\_0001.C8[c] 4 Mar 2011 10:58 Cal: LN\_BSA\_cytC 3 May 2007 15:40  
Shimadzu Biotech Axima CFRplus 2.8.1.20080410: Mode linear\_neg, Power: 180, Blanked, P.Ext. @ 6000 (bin 148)

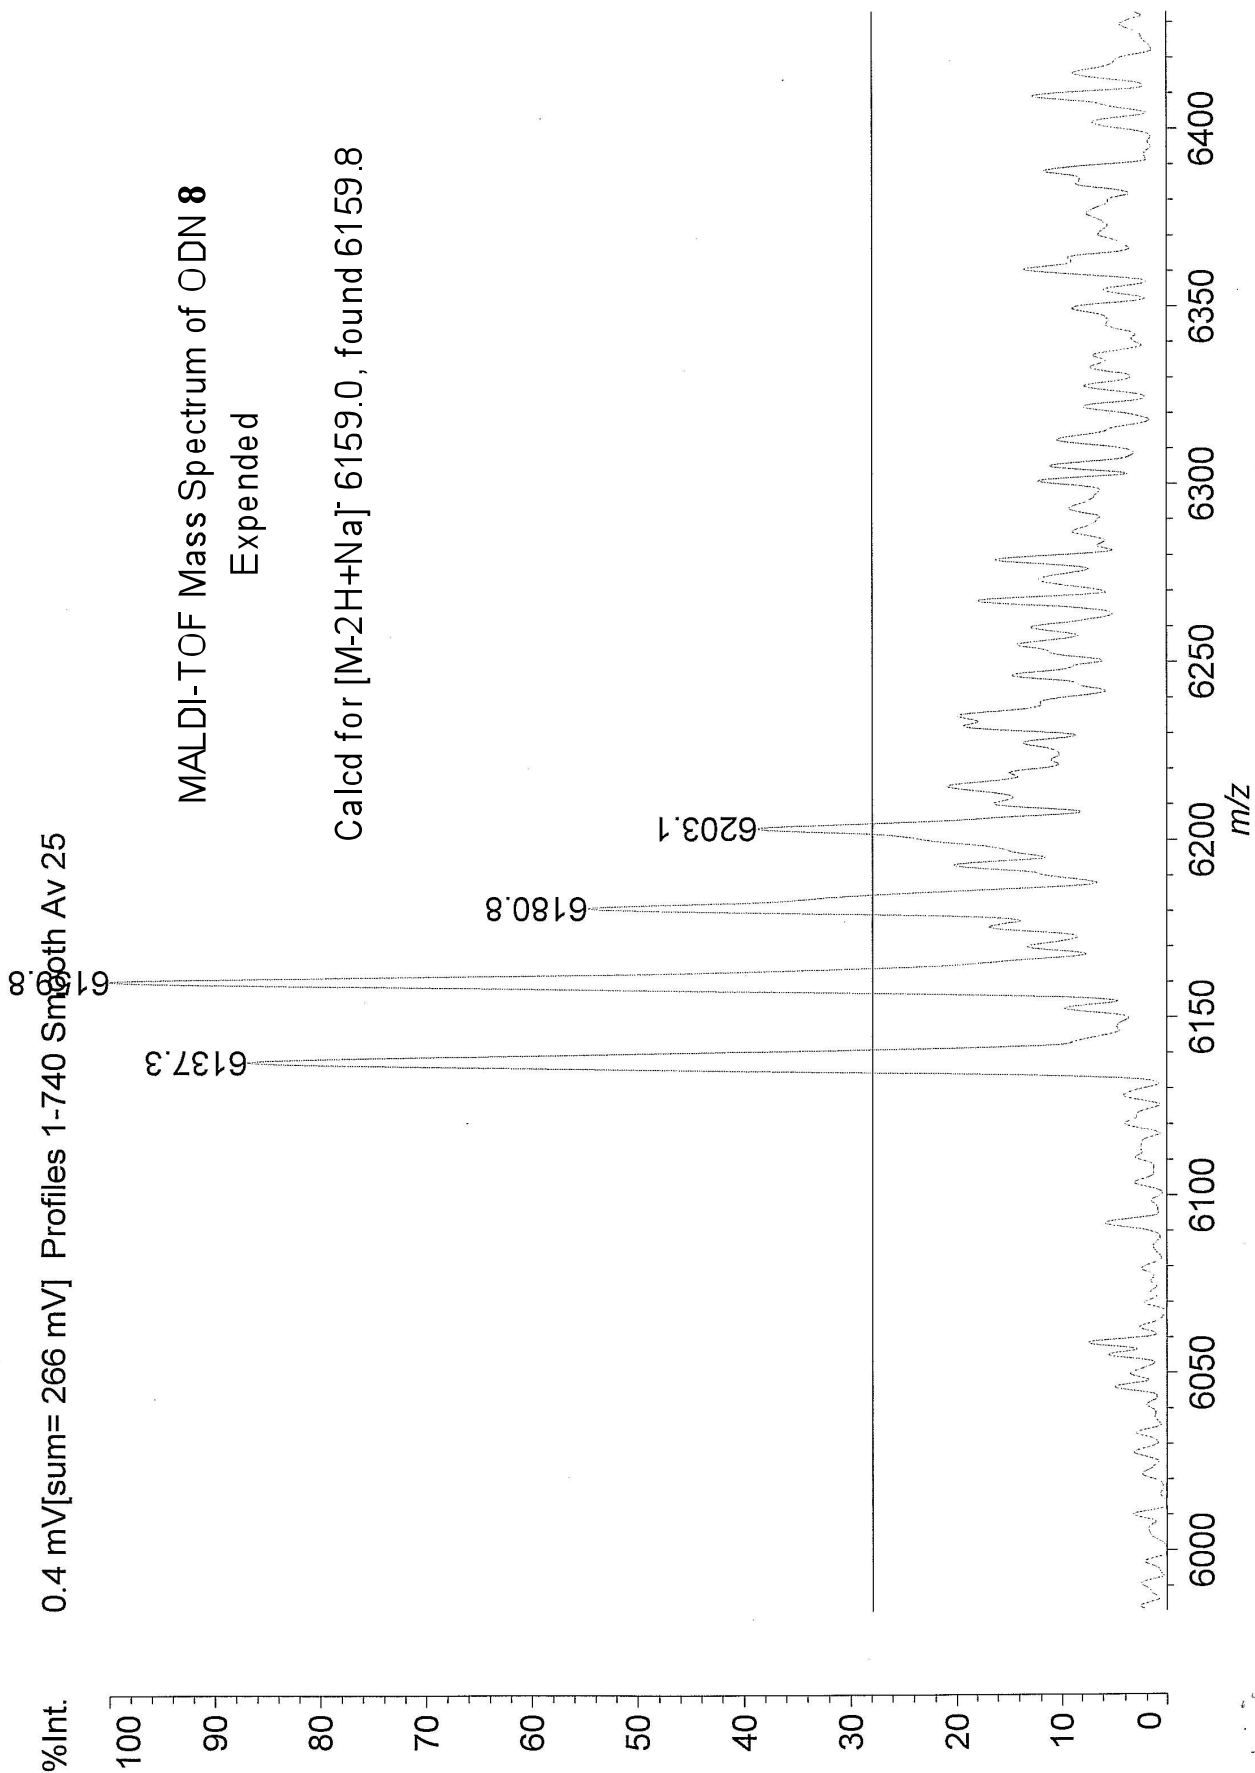

Supplement: c2ra01357f.pdf [file c2ra01357f.pdf]
